# Supplementary material
Source: PubMed Central journal article supplement (PMC7876883)
Supplement: advancesADV2020003401-suppl1.pdf [file advancesADV2020003401-suppl1.pdf]

## Supplemental appendix

### Table of contents

| <b>Section</b>       | <b>Page</b> |
|----------------------|-------------|
| Supplemental table   | 2           |
| Supplemental figures | 3           |

**Supplemental table**

| <b>Years from diagnosis</b> | <b>JAK2-V617F VAF [%]</b> | <b>GATA2-N317S VAF [%]</b> | <b>Karyotype</b>                       | <b>ETV6 deletion</b> | <b>Source</b> |
|-----------------------------|---------------------------|----------------------------|----------------------------------------|----------------------|---------------|
| 0                           | 55.2                      | 46.0                       | 46,XX,t(3;12)<br>(p21;p13)[3]/46,XX[7] | [50/200]<br>(25%)    | BM            |
| 4.0                         | 61.4                      | 47.9                       | NA                                     | NA                   | PB            |
| 4.6                         | 11.8                      | 50.0                       | NA                                     | NA                   | CU            |
| 6.4                         | 72.8                      | 50.5                       | NA                                     | NA                   | PB            |
| 6.5                         | 73.5                      | 49.2                       | NA                                     | NA                   | PB            |
| 6.6                         | 80.4                      | 47.6                       | NA                                     | NA                   | BM            |
| 6.6                         | 5.5                       | 51.6                       | NA                                     | NA                   | BS            |
| 6.8                         | NA                        | NA                         | NA                                     | [51/100]<br>(51%)    | BM            |

**Supplemental table 1. Molecular and cytogenetic parameters over time.** VAF, variant allele frequency. BM, bone marrow; PB, peripheral blood; CU, cervix uteri; BS, buccal swab; NA, not assessed. The *ETV6* deletion was assessed by fluorescence in situ hybridization; numbers in square brackets indicate number of positive probes per total cells analyzed.

**Supplemental figures**

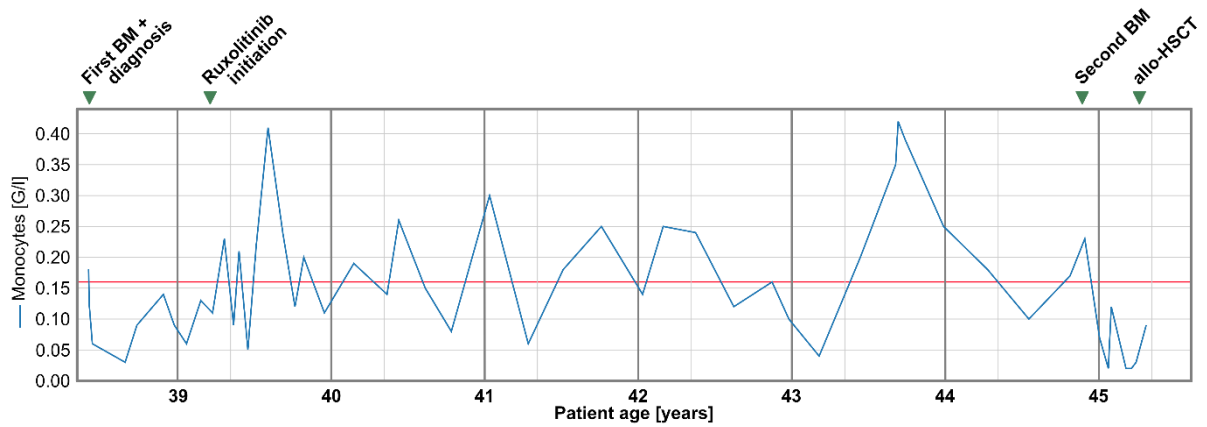

**Supplemental figure 1. Monocyte count over time.** Reference range 0.16-0.95 G/l. The red line refers to the lower reference value.

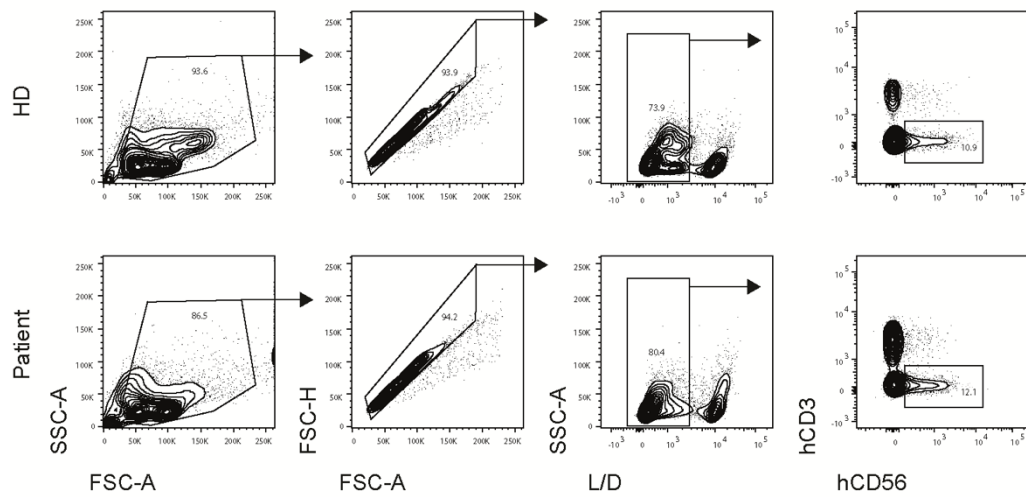

**Supplemental figure 2. Representative flow cytometric analysis of natural killer (NK) cells.** Top: Mobilized peripheral blood mononuclear cells (PBMCs) from a healthy donor (HD). Bottom: Patient PBMCs. NK cells were defined as CD3-CD56+. L/D, live/dead cells.
